# Supplementary material
Source: publisher figshare collection journal article supplement (https://gsajournals.figshare.com/ndownloader/files/23763968)
Supplement: Supplementary file 1 [file 23763968]

	Env	Trait	Fixed	Random	R.structure	Verr	H.plot	H.mean
8	ARH1_2016	Ear_Height_cm	Ear_Height_cm ~ Hybrid	~ Rep	units	153.4482313	0.200242419	0.325026959
15	DEH1_2014	Ear_Height_cm	Ear_Height_cm ~ Hybrid	~ Rep + Block:Rep + units	idv(Range):ar1(Pass)	25.55946012	0.635172415	0.538542247
23	DEH1_2015	Ear_Height_cm	Ear_Height_cm ~ Hybrid	~ Rep + Block:Rep	units	197.2252434	0.530053323	0.545858836
31	DEH1_2016	Ear_Height_cm	Ear_Height_cm ~ Hybrid	~ Rep	units	155.2226914	0.545948181	0.700558191
39	GAH1_2014	Ear_Height_cm	Ear_Height_cm ~ Hybrid	~ Rep + Block:Rep + units	ar1v(Range):ar1(Pass)	43.37973599	0.610738644	0.604205033
46	GAH1_2015	Ear_Height_cm	Ear_Height_cm ~ Hybrid	~ Rep	idv(Range):ar1(Pass)	1	0.990391299	0.5722337
54	GAH1_2016	Ear_Height_cm	Ear_Height_cm ~ Hybrid	~ Rep	units	87.23807762	0.526807335	0.689933175
66	IAH1_2016	Ear_Height_cm	Ear_Height_cm ~ Hybrid	~ Rep + units	ar1v(Range):ar1(Pass)	51.29645904	0.760500011	0.768721602
74	IAH1ab_2014	Ear_Height_cm	Ear_Height_cm ~ Hybrid	~ Rep + Block:Rep	units	119.8965175	0.397424187	0.523363657
82	IAH1c_2014	Ear_Height_cm	Ear_Height_cm ~ Hybrid	~ Rep + Block:Rep	units	88.95397703	0.332091593	0.440999076
88	IAH2_2014	Ear_Height_cm	Ear_Height_cm ~ Hybrid	~ Rep + Block:Rep	units	138.163192	0.282999251	0.429813723
99	IAH3_2014	Ear_Height_cm	Ear_Height_cm ~ Hybrid	~ Rep + Block:Rep	units	142.0598288	0.175897212	0.288034539
107	IAH3_2016	Ear_Height_cm	Ear_Height_cm ~ Hybrid	~ Rep	units	239.2590021	0.162037953	0.274334479
113	IAH4_2014	Ear_Height_cm	Ear_Height_cm ~ Hybrid	~ Rep + Block:Rep	units	108.0055661	0.360555827	0.507322853
125	ILH1_2014	Ear_Height_cm	Ear_Height_cm ~ Hybrid	~ Rep + Block:Rep	units	47.60203629	0.666625084	0.766433787
132	ILH1_2015	Ear_Height_cm	Ear_Height_cm ~ Hybrid	~ Rep + Block:Rep	units	67.80177029	0.780513996	0.780074806
139	ILH1_2016	Ear_Height_cm	Ear_Height_cm ~ Hybrid	~ Rep	units	215.7929308	0.192930098	0.265554585
154	INH1_2015	Ear_Height_cm	Ear_Height_cm ~ Hybrid	~ Rep + Block:Rep	ar1v(Range):ar1(Pass)	1	0.993738126	0.614886488
161	INH1_2016	Ear_Height_cm	Ear_Height_cm ~ Hybrid	~ Rep	units	128.9091812	0.571973479	0.717929932
166	KSH2_2016	Ear_Height_cm	Ear_Height_cm ~ Hybrid	~ Rep	units	92.95164281	0.596535294	0.636870899
174	MIH1_2016	Ear_Height_cm	Ear_Height_cm ~ Hybrid	~ Rep	units	100.4445663	0.652914556	0.775222476
182	MNH1_2014	Ear_Height_cm	Ear_Height_cm ~ Hybrid	~ Rep + Block:Rep	units	93.43583999	0.440913955	0.555667187
190	MNH1_2015	Ear_Height_cm	Ear_Height_cm ~ Hybrid	~ Rep + Block:Rep	units	78.57210578	0.690923467	0.715621937
199	MOH1_2014	Ear_Height_cm	Ear_Height_cm ~ Hybrid	~ Rep + Block:Rep	units	115.6787025	0.497149822	0.643373209
206	MOH1_2016	Ear_Height_cm	Ear_Height_cm ~ Hybrid	~ Rep	units	99.7272822	0.552621427	0.692211379
213	MOH1_MOH2_2015	Ear_Height_cm	Ear_Height_cm ~ Hybrid	~ Rep + Block:Rep	units	115.817241	0.750056911	0.789097758
220	MOH2_2014	Ear_Height_cm	Ear_Height_cm ~ Hybrid	~ Rep + Block:Rep	units	135.2450119	0.389362532	0.546283582
225	NCH1_2014	Ear_Height_cm	Ear_Height_cm ~ Hybrid	~ Rep + Block:Rep	idv(Range):ar1(Pass)	1	0.991017018	0.821959447
229	NCH1_2015	Ear_Height_cm	Ear_Height_cm ~ Hybrid	~ Rep + Block:Rep	units	55.28463667	0.795460276	0.799443954
234	NCH1_2016	Ear_Height_cm	Ear_Height_cm ~ Hybrid	~ Rep	units	83.29333537	0.580725689	0.713927919
242	NEH1_2014	Ear_Height_cm	Ear_Height_cm ~ Hybrid	~ Rep + Block:Rep + units	ar1v(Range):ar1(Pass)	10.91241461	0.831550235	0.828345788
252	NEH1_NEH4_2015	Ear_Height_cm	Ear_Height_cm ~ Hybrid	~ Rep + Block:Rep	units	99.7446074	0.632654045	0.695418482
260	NEH2_2014	Ear_Height_cm	Ear_Height_cm ~ Hybrid	~ Rep + Block:Rep	units	83.049839	0.363968697	0.485215636
271	NEH3_2014	Ear_Height_cm	Ear_Height_cm ~ Hybrid	~ Rep + Block:Rep	units	33.72333353	0.579770678	0.659526593
281	NYH1_2014	Ear_Height_cm	Ear_Height_cm ~ Hybrid	~ Rep + Block:Rep	units	76.44684559	0.6397288	0.722093948
288	NYH2_2015	Ear_Height_cm	Ear_Height_cm ~ Hybrid	~ Rep + Block:Rep	units	71.06557332	0.723053381	0.742939904
294	NYH2_2016	Ear_Height_cm	Ear_Height_cm ~ Hybrid	~ Rep	units	98.92545388	0.453646906	0.597647655
301	NYH3_2015	Ear_Height_cm	Ear_Height_cm ~ Hybrid	~ Rep + Block:Rep	idv(Range):ar1(Pass)	1	0.994238546	0.672691035
309	OHH1_2015	Ear_Height_cm	Ear_Height_cm ~ Hybrid	~ Rep + Block:Rep	units	50.49732778	0.740229268	0.745363333
315	OHH1_2016	Ear_Height_cm	Ear_Height_cm ~ Hybrid	~ Rep	units	75.47113669	0.66267423	0.788972962
323	ONH1_2014	Ear_Height_cm	Ear_Height_cm ~ Hybrid	~ Rep + Block:Rep	units	102.0941132	0.661247838	0.76895044
330	ONH1_2015	Ear_Height_cm	Ear_Height_cm ~ Hybrid	~ Rep + Block:Rep	units	322.2811765	0.102070807	0.133162862
337	ONH1_2016	Ear_Height_cm	Ear_Height_cm ~ Hybrid	~ Rep + units	ar1v(Range):ar1(Pass)	49.20658993	0.673856092	0.571576876
345	ONH2_2014	Ear_Height_cm	Ear_Height_cm ~ Hybrid	~ Rep + Block:Rep	units	131.0153353	0.332066924	0.480120764
353	ONH2_2015	Ear_Height_cm	Ear_Height_cm ~ Hybrid	~ Rep + Block:Rep	units	113.9950513	0.612935	0.66439263
360	ONH2_2016	Ear_Height_cm	Ear_Height_cm ~ Hybrid	~ Rep	units	122.2797252	0.659857244	0.782457037
368	SDH1_2015	Ear_Height_cm	Ear_Height_cm ~ Hybrid	~ Rep + Block:Rep	units	48.26941291	0.558413185	0.609375028
375	TXH1_2014	Ear_Height_cm	Ear_Height_cm ~ Hybrid	~ Rep + Block:Rep	units	74.91226013	0.34837628	0.500132252
382	TXH1_2015	Ear_Height_cm	Ear_Height_cm ~ Hybrid	~ Rep	units	56.73186596	0.787478089	0.835402269
389	TXH1_2016	Ear_Height_cm	Ear_Height_cm ~ Hybrid	~ Rep	units	65.1257195	0.518341744	0.665851562
397	TXH2_2014	Ear_Height_cm	Ear_Height_cm ~ Hybrid	~ Rep + Block:Rep	units	45.62702079	0.554684054	0.683919633
405	TXH2_2015	Ear_Height_cm	Ear_Height_cm ~ Hybrid	~ Rep + Block:Rep	units	71.6111039	0.697298185	0.760366792
413	WIH1_2014	Ear_Height_cm	Ear_Height_cm ~ Hybrid	~ Rep + Block:Rep	ar1(Range):idv(Pass)	1	0.988834555	0.76432386
418	WIH1_2015	Ear_Height_cm	Ear_Height_cm ~ Hybrid	~ Rep + Block:Rep	units	52.0372919	0.824945504	0.83643874
426	WIH1_2016	Ear_Height_cm	Ear_Height_cm ~ Hybrid	~ Rep	units	198.9941698	0.225048926	0.367190854
431	WIH2_2015	Ear_Height_cm	Ear_Height_cm ~ Hybrid	~ Rep + Block:Rep	units	57.55155132	0.780135794	0.794692607
439	WIH2_2016	Ear_Height_cm	Ear_Height_cm ~ Hybrid	~ Rep	units	61.75140781	0.753574895	0.852672572
2	ARH1_2016	Grain_Moisture	Grain_Moisture ~ Hybrid	~ Rep	units	3.035927637	0.475521596	0.640803073
10	DEH1_2014	Grain_Moisture	Grain_Moisture ~ Hybrid	~ Rep + Block:Rep	ar1v(Range):ar1(Pass)	1	0.583626928	0.869722969
17	DEH1_2015	Grain_Moisture	Grain_Moisture ~ Hybrid	~ Rep + Block:Rep	units	0.532096113	0.810195387	0.823159754
25	DEH1_2016	Grain_Moisture	Grain_Moisture ~ Hybrid	~ Rep	units	1.510498358	0.868442113	0.927190861
33	GAH1_2014	Grain_Moisture	Grain_Moisture ~ Hybrid	~ Rep + Block:Rep	units	1.491062573	0.337914161	0.492728896
41	GAH1_2015	Grain_Moisture	Grain_Moisture ~ Hybrid	~ Rep + units	ar1v(Range):ar1(Pass)	1.037455906	0.174561879	0.671679812
48	GAH1_2016	Grain_Moisture	Grain_Moisture ~ Hybrid	~ Rep	units	0.53513744	0.799668829	0.8886528
56	GAH2_2016	Grain_Moisture	Grain_Moisture ~ Hybrid	~ Rep	units	1.841288074	0.133594027	0.186560332
60	IAH1_2016	Grain_Moisture	Grain_Moisture ~ Hybrid	~ Rep + units	ar1v(Range):ar1(Pass)	1.008721525	0.329132317	0.883168516
68	IAH1ab_2014	Grain_Moisture	Grain_Moisture ~ Hybrid	~ Rep + Block:Rep + units	at(Experiment):ar1v(Range):ar1(Pass)	2.219019045	0.634387951	0.830166634
76	IAH1c_2014	Grain_Moisture	Grain_Moisture ~ Hybrid	~ Rep + Block:Rep	units	0.384040095	0.829871952	0.850682106
84	IAH2_2014	Grain_Moisture	Grain_Moisture ~ Hybrid	~ Rep + Block:Rep	units	0.633502614	0.817350033	0.877748783
90	IAH2_2016	Grain_Moisture	Grain_Moisture ~ Hybrid	~ Rep	units	0.705678039	0.773586459	0.866078955
95	IAH3_2014	Grain_Moisture	Grain_Moisture ~ Hybrid	~ Rep + Block:Rep + units	ar1v(Range):ar1(Pass)	1.090449545	0.759472327	0.940356139
101	IAH3_2016	Grain_Moisture	Grain_Moisture ~ Hybrid	~ Rep	units	1.720964871	0.55742754	0.705610898
109	IAH4_2014	Grain_Moisture	Grain_Moisture ~ Hybrid	~ Rep + Block:Rep	units	0.550988418	0.818424048	0.872279135
115	IAH4_2016	Grain_Moisture	Grain_Moisture ~ Hybrid	~ Rep + units	ar1v(Range):ar1(Pass)	1.054371269	0.661135148	0.953968886
119	ILH1_2014	Grain_Moisture	Grain_Moisture ~ Hybrid	~ Rep + Block:Rep	ar1(Range):idv(Pass)	1	0.711713026	0.878997295
134	ILH1_2016	Grain_Moisture	Grain_Moisture ~ Hybrid	~ Rep	units	1.289758988	0.205036562	0.282391242
141	INH1_2014	Grain_Moisture	Grain_Moisture ~ Hybrid	~ Rep + Block:Rep + units	ar1v(Range):ar1(Pass)	1.498624408	0.735131787	0.848661615
148	INH1_2015	Grain_Moisture	Grain_Moisture ~ Hybrid	~ Rep + Block:Rep	units	1.960590895	0.618483126	0.63474234
156	INH1_2016	Grain_Moisture	Grain_Moisture ~ Hybrid	~ Rep	idv(Range):ar1(Pass)	1	0.807056505	0.863596545
163	KSH2_2016	Grain_Moisture	Grain_Moisture ~ Hybrid	~ Rep	units	0.796807049	0.686317309	0.718546928
168	MIH1_2016	Grain_Moisture	Grain_Moisture ~ Hybrid	~ Rep	units	0.75182305	0.896896793	0.940272369
176	MNH1_2014	Grain_Moisture	Grain_Moisture ~ Hybrid	~ Rep + Block:Rep	units	4.043614975	0.242918877	0.347581326
184	MNH1_2015	Grain_Moisture	Grain_Moisture ~ Hybrid	~ Rep + Block:Rep	units	0.347200659	0.892190715	0.902013872
192	MNH1_2016	Grain_Moisture	Grain_Moisture ~ Hybrid	~ Rep	units	1.454012605	0.798756604	0.880148839
194	MOH1_2014	Grain_Moisture	Grain_Moisture ~ Hybrid	~ Rep + Block:Rep	ar1v(Range):ar1(Pass)	1	0.303983751	0.799945141
201	MOH1_2016	Grain_Moisture	Grain_Moisture ~ Hybrid	~ Rep	units	0.223169204	0.792563635	0.87278256
208	MOH1_MOH2_2015	Grain_Moisture	Grain_Moisture ~ Hybrid	~ Rep + Block:Rep	units	1.663872336	0.400431609	0.465824282
215	MOH2_2014	Grain_Moisture	Grain_Moisture ~ Hybrid	~ Rep + Block:Rep	ar1(Range):idv(Pass)	1	0.044683457	0.689817383
222	NCH1_2014	Grain_Moisture	Grain_Moisture ~ Hybrid	~ Rep + Block:Rep + units	ar1v(Range):ar1(Pass)	1.114557437	0.175839361	0.598900732
227	NCH1_2015	Grain_Moisture	Grain_Moisture ~ Hybrid	~ Rep + Block:Rep	ar1v(Range):ar1(Pass)	1	0.601623896	0.869015055
231	NCH1_2016	Grain_Moisture	Grain_Moisture ~ Hybrid	~ Rep	units	0.491274172	0.463549578	0.610946374
236	NEH1_2014	Grain_Moisture	Grain_Moisture ~ Hybrid	~ Rep + Block:Rep	units	2.720810197	0.539639234	0.677752214
244	NEH1_2016	Grain_Moisture	Grain_Moisture ~ Hybrid	~ Rep	units	0.166694571	0.617982772	0.761806076
248	NEH1_NEH4_2015	Grain_Moisture	Grain_Moisture ~ Hybrid	~ Rep + Block:Rep	at(Experiment):idv(Range):ar1(Pass)	2	0.339730093	0.62991701
254	NEH2_2014	Grain_Moisture	Grain_Moisture ~ Hybrid	~ Rep + Block:Rep	units	4.413978336	0.434319513	0.556631757
262	NEH2_2015	Grain_Moisture	Grain_Moisture ~ Hybrid	~ Rep + Block:Rep	units	1.07293724	0.669540295	0.69026886
268	NEH3_2014	Grain_Moisture	Grain_Moisture ~ Hybrid	~ Rep + Block:Rep	idv(Range):ar1(Pass)	1	0.530700318	0.361114744
273	NEH3_2015	Grain_Moisture	Grain_Moisture ~ Hybrid	~ Rep + Block:Rep	units	5.099661869	0.301195902	0.322413887
277	NYH1_2014	Grain_Moisture	Grain_Moisture ~ Hybrid	~ Rep + Block:Rep + units	ar1v(Range):ar1(Pass)	1.243324125	0.544591263	0.742689297
283	NYH2_2015	Grain_Moisture	Grain_Moisture ~ Hybrid	~ Rep + Block:Rep	units	0.765257974	0.727298663	0.753432275
290	NYH2_2016	Grain_Moisture	Grain_Moisture ~ Hybrid	~ Rep	units	2.795007344	0.397245067	0.54222259
296	NYH3_2015	Grain_Moisture	Grain_Moisture ~ Hybrid	~ Rep + Block:Rep	units	1.451552835	0.804419543	0.833447518
303	OHH1_2015	Grain_Moisture	Grain_Moisture ~ Hybrid	~ Rep + Block:Rep	units	0.929747611	0.828968722	0.835466317
311	OHH1_2016	Grain_Moisture	Grain_Moisture ~ Hybrid	~ Rep	units	0.843720046	0.894685205	0.941288224
317	ONH1_2014	Grain_Moisture	Grain_Moisture ~ Hybrid	~ Rep + Block:Rep	units	5.890761984	0.784788797	0.843046723
325	ONH1_2015	Grain_Moisture	Grain_Moisture ~ Hybrid	~ Rep + Block:Rep	units	4.491006424	0.793812765	0.817540835
332	ONH1_2016	Grain_Moisture	Grain_Moisture ~ Hybrid	~ Rep	ar1v(Range):ar1(Pass)	1	0.925686794	0.92705488
339	ONH2_2014	Grain_Moisture	Grain_Moisture ~ Hybrid	~ Rep + Block:Rep + units	ar1v(Range):ar1(Pass)	1.580404164	0.806846726	0.885952106
347	ONH2_2015	Grain_Moisture	Grain_Moisture ~ Hybrid	~ Rep + Block:Rep	units	0.994093574	0.933000449	0.942882361
355	ONH2_2016	Grain_Moisture	Grain_Moisture ~ Hybrid	~ Rep	units	0.862491599	0.820925953	0.893929633
362	SDH1_2015	Grain_Moisture	Grain_Moisture ~ Hybrid	~ Rep + Block:Rep	units	11.17237547	0.630953149	0.682239975
370	TXH1_2014	Grain_Moisture	Grain_Moisture ~ Hybrid	~ Rep + Block:Rep + units	ar1v(Range):ar1(Pass)	1.164851158	0.042357262	0.266178035
377	TXH1_2015	Grain_Moisture	Grain_Moisture ~ Hybrid	~ Rep + units	ar1v(Range):ar1(Pass)	1.00000028	0.792411024	0.960137221
384	TXH1_2016	Grain_Moisture	Grain_Moisture ~ Hybrid	~ Rep	units	0.142339753	0.653323572	0.782457134
391	TXH2_2014	Grain_Moisture	Grain_Moisture ~ Hybrid	~ Rep + Block:Rep	units	1.679543241	0.335894165	0.472505983
399	TXH2_2015	Grain_Moisture	Grain_Moisture ~ Hybrid	~ Rep + Block:Rep	units	2.865611364	0.54713827	0.627925551
407	WIH1_2014	Grain_Moisture	Grain_Moisture ~ Hybrid	~ Rep + Block:Rep + units	ar1(Range):idv(Pass)	1.000000764	0.877782792	0.939110544
415	WIH1_2015	Grain_Moisture	Grain_Moisture ~ Hybrid	~ Rep + Block:Rep	ar1(Range):idv(Pass)	1	0.96926971	0.664254782
420	WIH1_2016	Grain_Moisture	Grain_Moisture ~ Hybrid	~ Rep	units	0.492946586	0.935220907	0.965494766
428	WIH2_2015	Grain_Moisture	Grain_Moisture ~ Hybrid	~ Rep + Block:Rep	units	7.555487791	0.855468698	0.868506562
433	WIH2_2016	Grain_Moisture	Grain_Moisture ~ Hybrid	~ Rep	units	1.271261693	0.822377934	0.897248068
4	ARH1_2016	Lodging	Lodging ~ Hybrid	~ Rep	units	0.000515906	0.38628869	0.553773124
11	DEH1_2014	Lodging	Lodging ~ Hybrid	~ Rep + Block:Rep	units	0.007347582	0.592421676	0.712448597
19	DEH1_2015	Lodging	Lodging ~ Hybrid	~ Rep + Block:Rep	units	0.002044275	0.5194188	0.544809018
27	DEH1_2016	Lodging	Lodging ~ Hybrid	~ Rep	units	0.029939805	0.183545702	0.306841828
35	GAH1_2014	Lodging	Lodging ~ Hybrid	~ Rep + Block:Rep	units	0.011516515	0.361729994	0.515063035
42	GAH1_2015	Lodging	Lodging ~ Hybrid	~ Rep	units	0.015086901	0.641393322	0.721334534
50	GAH1_2016	Lodging	Lodging ~ Hybrid	~ Rep	units	0.006636017	0.438670552	0.611124831
62	IAH1_2016	Lodging	Lodging ~ Hybrid	~ Rep	units	0.006364754	0.439617881	0.601410893
70	IAH1ab_2014	Lodging	Lodging ~ Hybrid	~ Rep + Block:Rep	at(Experiment):idv(Range):ar1(Pass)	2	0.001233784	0.458205344
78	IAH1c_2014	Lodging	Lodging ~ Hybrid	~ Rep + Block:Rep	units	0.000667194	0.351597201	0.463517406
86	IAH2_2014	Lodging	Lodging ~ Hybrid	~ Rep + Block:Rep	units	0.010331022	0.430267869	0.59276744
97	IAH3_2014	Lodging	Lodging ~ Hybrid	~ Rep + Block:Rep	units	0.001377447	0.59351456	0.726492388
103	IAH3_2016	Lodging	Lodging ~ Hybrid	~ Rep	units	0.003505071	0.106593258	0.190954596
111	IAH4_2014	Lodging	Lodging ~ Hybrid	~ Rep + Block:Rep	ar1v(Range):ar1(Pass)	1	0.006164743	0.660253158
117	IAH4_2016	Lodging	Lodging ~ Hybrid	~ Rep + units	ar1v(Range):ar1(Pass)	1.012258646	0.027087615	0.614556867
121	ILH1_2014	Lodging	Lodging ~ Hybrid	~ Rep + Block:Rep	idv(Range):ar1(Pass)	1	0.00298716	0.576044935
128	ILH1_2015	Lodging	Lodging ~ Hybrid	~ Rep + Block:Rep	units	0.003032025	0.797540777	0.797424891
135	ILH1_2016	Lodging	Lodging ~ Hybrid	~ Rep	units	0.000646257	0.496169006	0.590998337
143	INH1_2014	Lodging	Lodging ~ Hybrid	~ Rep + Block:Rep	units	0.000503033	0.071780614	0.127632939
150	INH1_2015	Lodging	Lodging ~ Hybrid	~ Rep + Block:Rep	ar1(Range):idv(Pass)	1	0.007801289	0.756144973
157	INH1_2016	Lodging	Lodging ~ Hybrid	~ Rep + units	ar1v(Range):ar1(Pass)	1.00432169	0.026003483	0.525465061
164	KSH2_2016	Lodging	Lodging ~ Hybrid	~ Rep	units	0.000883233	0.373358334	0.417975553
170	MIH1_2016	Lodging	Lodging ~ Hybrid	~ Rep	units	0.014021675	0.270111655	0.409986546
178	MNH1_2014	Lodging	Lodging ~ Hybrid	~ Rep + Block:Rep	units	0.012511943	0.203902248	0.304020041
186	MNH1_2015	Lodging	Lodging ~ Hybrid	~ Rep + Block:Rep	units	0.015933729	0.647613349	0.664694013
195	MOH1_2014	Lodging	Lodging ~ Hybrid	~ Rep + Block:Rep	units	0.006939827	0.24049201	0.371502748
202	MOH1_2016	Lodging	Lodging ~ Hybrid	~ Rep	units	0.002707652	0.572171993	0.708676985
209	MOH1_MOH2_2015	Lodging	Lodging ~ Hybrid	~ Rep + Block:Rep	at(Experiment):ar1(Range):idv(Pass)	2	0.00213129	0.544022135
216	MOH2_2014	Lodging	Lodging ~ Hybrid	~ Rep + Block:Rep	units	0.002997866	0.552351153	0.699795699
223	NCH1_2014	Lodging	Lodging ~ Hybrid	~ Rep + Block:Rep	units	0.010120551	0.492396721	0.62913018
232	NCH1_2016	Lodging	Lodging ~ Hybrid	~ Rep	units	0.010560293	0.52365437	0.665425307
238	NEH1_2014	Lodging	Lodging ~ Hybrid	~ Rep + Block:Rep	units	0.007039252	0.077189185	0.137105842
246	NEH1_2016	Lodging	Lodging ~ Hybrid	~ Rep	units	0.014703232	0.479982484	0.646562135
256	NEH2_2014	Lodging	Lodging ~ Hybrid	~ Rep + Block:Rep	units	0.003054143	0.081322282	0.135430146
264	NEH2_2015	Lodging	Lodging ~ Hybrid	~ Rep + Block:Rep	units	0.004429175	0.204484845	0.220827635
278	NYH1_2014	Lodging	Lodging ~ Hybrid	~ Rep + Block:Rep	units	0.00598938	0.686051795	0.778796151
284	NYH2_2015	Lodging	Lodging ~ Hybrid	~ Rep + Block:Rep	units	0.01193511	0.574730719	0.616039164
291	NYH2_2016	Lodging	Lodging ~ Hybrid	~ Rep	units	0.005231633	0.677270513	0.78675495
297	NYH3_2015	Lodging	Lodging ~ Hybrid	~ Rep + Block:Rep	units	0.019259	0.299221525	0.349484402
305	OHH1_2015	Lodging	Lodging ~ Hybrid	~ Rep + Block:Rep	units	0.002290647	0.526303059	0.547058141
313	OHH1_2016	Lodging	Lodging ~ Hybrid	~ Rep	units	0.042444174	0.720684444	0.830535736
319	ONH1_2014	Lodging	Lodging ~ Hybrid	~ Rep + Block:Rep	units	0.000323257	0.777961024	0.858921839
327	ONH1_2015	Lodging	Lodging ~ Hybrid	~ Rep + Block:Rep	units	0.000477266	0.69570373	0.739807536
334	ONH1_2016	Lodging	Lodging ~ Hybrid	~ Rep	units	0.000947179	0.244955206	0.377333709
341	ONH2_2014	Lodging	Lodging ~ Hybrid	~ Rep + Block:Rep	idv(Range):ar1(Pass)	1	0.028038578	0.611207487
349	ONH2_2015	Lodging	Lodging ~ Hybrid	~ Rep + Block:Rep	units	0.002297938	0.745746958	0.787841337
357	ONH2_2016	Lodging	Lodging ~ Hybrid	~ Rep	units	0.011688293	0.556939021	0.701063558
364	SDH1_2015	Lodging	Lodging ~ Hybrid	~ Rep + Block:Rep	units	0.004640711	0.255878505	0.314183051
393	TXH2_2014	Lodging	Lodging ~ Hybrid	~ Rep + Block:Rep	units	0.001205445	0.532306928	0.668999024
401	TXH2_2015	Lodging	Lodging ~ Hybrid	~ Rep + Block:Rep	units	0.01077961	0.546245206	0.622974394
409	WIH1_2014	Lodging	Lodging ~ Hybrid	~ Rep + Block:Rep	units	0.001615333	0.384983586	0.580299194
422	WIH1_2016	Lodging	Lodging ~ Hybrid	~ Rep	units	0.005464716	0.382151687	0.550769092
429	WIH2_2015	Lodging	Lodging ~ Hybrid	~ Rep + Block:Rep	units	6.89E-05	0.937067615	0.939226834
435	WIH2_2016	Lodging	Lodging ~ Hybrid	~ Rep	units	0.038176597	0.336117206	0.495224795
7	ARH1_2016	Plant_Height_cm	Plant_Height_cm ~ Hybrid	~ Rep	units	170.0429662	0.453796368	0.612252813
14	DEH1_2014	Plant_Height_cm	Plant_Height_cm ~ Hybrid	~ Rep + Block:Rep + units	ar1v(Range):ar1(Pass)	14.20329841	0.879776088	0.702067156
22	DEH1_2015	Plant_Height_cm	Plant_Height_cm ~ Hybrid	~ Rep + Block:Rep	units	115.8191369	0.793330772	0.796402159
30	DEH1_2016	Plant_Height_cm	Plant_Height_cm ~ Hybrid	~ Rep	units	158.6428761	0.581674166	0.729929011
38	GAH1_2014	Plant_Height_cm	Plant_Height_cm ~ Hybrid	~ Rep + Block:Rep + units	ar1v(Range):ar1(Pass)	71.0246454	0.733013156	0.690501454
45	GAH1_2015	Plant_Height_cm	Plant_Height_cm ~ Hybrid	~ Rep + units	ar1v(Range):ar1(Pass)	34.03835241	0.875033789	0.755525726
53	GAH1_2016	Plant_Height_cm	Plant_Height_cm ~ Hybrid	~ Rep	units	180.9378255	0.512228124	0.677382473
65	IAH1_2016	Plant_Height_cm	Plant_Height_cm ~ Hybrid	~ Rep + units	ar1v(Range):ar1(Pass)	49.5889032	0.812857878	0.800743293
73	IAH1ab_2014	Plant_Height_cm	Plant_Height_cm ~ Hybrid	~ Rep + Block:Rep + units	at(Experiment):ar1(Range):idv(Pass)	52.84426394	0.656515545	0.558762695
81	IAH1c_2014	Plant_Height_cm	Plant_Height_cm ~ Hybrid	~ Rep + Block:Rep	units	141.2547865	0.321977518	0.429680916
87	IAH2_2014	Plant_Height_cm	Plant_Height_cm ~ Hybrid	~ Rep + Block:Rep	units	155.6234603	0.379665418	0.539606251
98	IAH3_2014	Plant_Height_cm	Plant_Height_cm ~ Hybrid	~ Rep + Block:Rep	units	155.8542097	0.252455664	0.388227031
106	IAH3_2016	Plant_Height_cm	Plant_Height_cm ~ Hybrid	~ Rep	units	259.4146508	0.204526765	0.333474156
112	IAH4_2014	Plant_Height_cm	Plant_Height_cm ~ Hybrid	~ Rep + Block:Rep	units	122.0729045	0.37639528	0.525431953
124	ILH1_2014	Plant_Height_cm	Plant_Height_cm ~ Hybrid	~ Rep + Block:Rep	units	88.92837494	0.697209296	0.787792198
131	ILH1_2015	Plant_Height_cm	Plant_Height_cm ~ Hybrid	~ Rep + Block:Rep	units	114.9040981	0.764008555	0.763759578
138	ILH1_2016	Plant_Height_cm	Plant_Height_cm ~ Hybrid	~ Rep	units	219.152631	0.17674695	0.245589264
146	INH1_2014	Plant_Height_cm	Plant_Height_cm ~ Hybrid	~ Rep + Block:Rep	units	227.7581558	0.159350173	0.261324687
153	INH1_2015	Plant_Height_cm	Plant_Height_cm ~ Hybrid	~ Rep + Block:Rep	units	150.8175991	0.760414098	0.756678336
160	INH1_2016	Plant_Height_cm	Plant_Height_cm ~ Hybrid	~ Rep	idv(Range):ar1(Pass)	1	0.995871282	0.679497116
165	KSH2_2016	Plant_Height_cm	Plant_Height_cm ~ Hybrid	~ Rep	units	154.1736535	0.368741208	0.412527597
173	MIH1_2016	Plant_Height_cm	Plant_Height_cm ~ Hybrid	~ Rep	units	197.2505176	0.565066398	0.705427607
181	MNH1_2014	Plant_Height_cm	Plant_Height_cm ~ Hybrid	~ Rep + Block:Rep + units	ar1v(Range):ar1(Pass)	52.01650551	0.69243712	0.640928809
189	MNH1_2015	Plant_Height_cm	Plant_Height_cm ~ Hybrid	~ Rep + Block:Rep	units	58.46460394	0.822711503	0.834428155
198	MOH1_2014	Plant_Height_cm	Plant_Height_cm ~ Hybrid	~ Rep + Block:Rep	units	109.1233289	0.672631129	0.785309161
205	MOH1_2016	Plant_Height_cm	Plant_Height_cm ~ Hybrid	~ Rep	units	94.42464694	0.710794433	0.815951357
212	MOH1_MOH2_2015	Plant_Height_cm	Plant_Height_cm ~ Hybrid	~ Rep + Block:Rep	units	162.3095676	0.736071291	0.77137745
219	MOH2_2014	Plant_Height_cm	Plant_Height_cm ~ Hybrid	~ Rep + Block:Rep	units	128.3939239	0.532873334	0.67465792
224	NCH1_2014	Plant_Height_cm	Plant_Height_cm ~ Hybrid	~ Rep + Block:Rep	idv(Range):ar1(Pass)	1	0.995624645	0.879429892
228	NCH1_2015	Plant_Height_cm	Plant_Height_cm ~ Hybrid	~ Rep + Block:Rep	units	106.577564	0.795825454	0.795758982
233	NCH1_2016	Plant_Height_cm	Plant_Height_cm ~ Hybrid	~ Rep	units	110.2933113	0.64224263	0.763112576
241	NEH1_2014	Plant_Height_cm	Plant_Height_cm ~ Hybrid	~ Rep + Block:Rep + units	ar1v(Range):ar1(Pass)	1.0000016	0.989014417	0.843888656
251	NEH1_NEH4_2015	Plant_Height_cm	Plant_Height_cm ~ Hybrid	~ Rep + Block:Rep	units	147.1382712	0.763617738	0.808607366
259	NEH2_2014	Plant_Height_cm	Plant_Height_cm ~ Hybrid	~ Rep + Block:Rep + units	ar1v(Range):ar1(Pass)	45.9518486	0.493688156	0.301922103
270	NEH3_2014	Plant_Height_cm	Plant_Height_cm ~ Hybrid	~ Rep + Block:Rep + units	ar1v(Range):ar1(Pass)	21.38271526	0.654115548	0.500092779
280	NYH1_2014	Plant_Height_cm	Plant_Height_cm ~ Hybrid	~ Rep + Block:Rep + units	ar1v(Range):ar1(Pass)	53.42411227	0.716498334	0.715745565
287	NYH2_2015	Plant_Height_cm	Plant_Height_cm ~ Hybrid	~ Rep + Block:Rep	ar1(Range):idv(Pass)	1	0.997647232	0.880249195
293	NYH2_2016	Plant_Height_cm	Plant_Height_cm ~ Hybrid	~ Rep	units	202.6468343	0.395484856	0.540463889
300	NYH3_2015	Plant_Height_cm	Plant_Height_cm ~ Hybrid	~ Rep + Block:Rep	ar1v(Range):ar1(Pass)	1	0.995471486	0.720356936
308	OHH1_2015	Plant_Height_cm	Plant_Height_cm ~ Hybrid	~ Rep + Block:Rep	units	72.18952706	0.879139771	0.876337115
314	OHH1_2016	Plant_Height_cm	Plant_Height_cm ~ Hybrid	~ Rep	units	121.6717913	0.725084736	0.833551719
322	ONH1_2014	Plant_Height_cm	Plant_Height_cm ~ Hybrid	~ Rep + Block:Rep	units	91.28279706	0.766056708	0.838584105
336	ONH1_2016	Plant_Height_cm	Plant_Height_cm ~ Hybrid	~ Rep + units	ar1v(Range):ar1(Pass)	1.000025298	0.995250587	0.69137249
344	ONH2_2014	Plant_Height_cm	Plant_Height_cm ~ Hybrid	~ Rep + Block:Rep	units	148.4953512	0.601522745	0.724068471
352	ONH2_2015	Plant_Height_cm	Plant_Height_cm ~ Hybrid	~ Rep + Block:Rep	units	109.0596772	0.792990982	0.823073506
359	ONH2_2016	Plant_Height_cm	Plant_Height_cm ~ Hybrid	~ Rep	units	135.7149157	0.700968922	0.81259739
367	SDH1_2015	Plant_Height_cm	Plant_Height_cm ~ Hybrid	~ Rep + Block:Rep	units	84.00098013	0.561601084	0.611589176
374	TXH1_2014	Plant_Height_cm	Plant_Height_cm ~ Hybrid	~ Rep + Block:Rep	units	78.93316768	0.540009741	0.682677471
381	TXH1_2015	Plant_Height_cm	Plant_Height_cm ~ Hybrid	~ Rep	units	245.2446539	0.073228564	0.10556632
388	TXH1_2016	Plant_Height_cm	Plant_Height_cm ~ Hybrid	~ Rep	units	94.87189171	0.597765138	0.732635164
396	TXH2_2014	Plant_Height_cm	Plant_Height_cm ~ Hybrid	~ Rep + Block:Rep	units	127.5797849	0.461927026	0.598091651
404	TXH2_2015	Plant_Height_cm	Plant_Height_cm ~ Hybrid	~ Rep + Block:Rep	units	235.8675624	0.641883857	0.717678587
412	WIH1_2014	Plant_Height_cm	Plant_Height_cm ~ Hybrid	~ Rep + Block:Rep	units	95.16583711	0.627350681	0.770961531
417	WIH1_2015	Plant_Height_cm	Plant_Height_cm ~ Hybrid	~ Rep + Block:Rep	units	51.46118356	0.83172556	0.840792089
425	WIH1_2016	Plant_Height_cm	Plant_Height_cm ~ Hybrid	~ Rep	units	275.9143428	0.161489637	0.278748162
430	WIH2_2015	Plant_Height_cm	Plant_Height_cm ~ Hybrid	~ Rep + Block:Rep	units	126.362823	0.52651816	0.543543185
438	WIH2_2016	Plant_Height_cm	Plant_Height_cm ~ Hybrid	~ Rep	units	72.37632855	0.815235552	0.892754416
5	ARH1_2016	Pollen_DAP	Pollen_DAP ~ Hybrid	~ Rep	units	1.041573469	0.843129979	0.913031107
12	DEH1_2014	Pollen_DAP	Pollen_DAP ~ Hybrid	~ Rep + Block:Rep	units	0.967629963	0.760043621	0.821989413
20	DEH1_2015	Pollen_DAP	Pollen_DAP ~ Hybrid	~ Rep + Block:Rep	ar1v(Range):ar1(Pass)	1	0.802781878	0.86077547
28	DEH1_2016	Pollen_DAP	Pollen_DAP ~ Hybrid	~ Rep	units	3.044307958	0.433305214	0.598857886
36	GAH1_2014	Pollen_DAP	Pollen_DAP ~ Hybrid	~ Rep + Block:Rep + units	ar1v(Range):ar1(Pass)	1.79904883	0.599176598	0.739806151
43	GAH1_2015	Pollen_DAP	Pollen_DAP ~ Hybrid	~ Rep	units	1.246855734	0.911115307	0.935148913
51	GAH1_2016	Pollen_DAP	Pollen_DAP ~ Hybrid	~ Rep	units	1.154639091	0.843206945	0.914857615
57	GAH2_2016	Pollen_DAP	Pollen_DAP ~ Hybrid	~ Rep	units	1.005409274	0.878734506	0.90792009
63	IAH1_2016	Pollen_DAP	Pollen_DAP ~ Hybrid	~ Rep	units	1.100746262	0.877820508	0.930816813
71	IAH1ab_2014	Pollen_DAP	Pollen_DAP ~ Hybrid	~ Rep + Block:Rep + units	at(Experiment):ar1v(Range):ar1(Pass)	2.243872728	0.677440269	0.857909172
79	IAH1c_2014	Pollen_DAP	Pollen_DAP ~ Hybrid	~ Rep + Block:Rep	units	0.901479059	0.58194012	0.661445082
92	IAH2_2016	Pollen_DAP	Pollen_DAP ~ Hybrid	~ Rep + units	ar1v(Range):ar1(Pass)	1.393063205	0.850884036	0.935579153
104	IAH3_2016	Pollen_DAP	Pollen_DAP ~ Hybrid	~ Rep	units	3.104803925	0.447526893	0.607852255
122	ILH1_2014	Pollen_DAP	Pollen_DAP ~ Hybrid	~ Rep + Block:Rep	units	1.167854265	0.797140656	0.850576444
129	ILH1_2015	Pollen_DAP	Pollen_DAP ~ Hybrid	~ Rep + Block:Rep	units	0.62554662	0.940888681	0.940104002
136	ILH1_2016	Pollen_DAP	Pollen_DAP ~ Hybrid	~ Rep	units	2.396853818	0.203011696	0.279043661
144	INH1_2014	Pollen_DAP	Pollen_DAP ~ Hybrid	~ Rep + Block:Rep	units	11.91713637	0.249898949	0.38223399
151	INH1_2015	Pollen_DAP	Pollen_DAP ~ Hybrid	~ Rep + Block:Rep	ar1v(Range):ar1(Pass)	1	0.885413312	0.860179801
158	INH1_2016	Pollen_DAP	Pollen_DAP ~ Hybrid	~ Rep + units	ar1v(Range):ar1(Pass)	1.410229575	0.771009078	0.838464326
171	MIH1_2016	Pollen_DAP	Pollen_DAP ~ Hybrid	~ Rep	units	1.613863726	0.842021401	0.906276298
179	MNH1_2014	Pollen_DAP	Pollen_DAP ~ Hybrid	~ Rep + Block:Rep + units	idv(Range):ar1(Pass)	1.111453147	0.719869026	0.821823001
187	MNH1_2015	Pollen_DAP	Pollen_DAP ~ Hybrid	~ Rep + Block:Rep	units	4.986755998	0.681876694	0.69674404
196	MOH1_2014	Pollen_DAP	Pollen_DAP ~ Hybrid	~ Rep + Block:Rep	units	1.104470485	0.856510537	0.899709335
203	MOH1_2016	Pollen_DAP	Pollen_DAP ~ Hybrid	~ Rep	units	0.850296814	0.840032604	0.903878418
210	MOH1_MOH2_2015	Pollen_DAP	Pollen_DAP ~ Hybrid	~ Rep + Block:Rep + units	at(Experiment):ar1v(Range):ar1(Pass)	2.472395115	0.794372158	0.896583149
217	MOH2_2014	Pollen_DAP	Pollen_DAP ~ Hybrid	~ Rep + Block:Rep	units	0.742770263	0.754428151	0.830479291
239	NEH1_2014	Pollen_DAP	Pollen_DAP ~ Hybrid	~ Rep + Block:Rep	units	3.213943488	0.610354569	0.729268232
250	NEH1_NEH4_2015	Pollen_DAP	Pollen_DAP ~ Hybrid	~ Rep + Block:Rep	units	2.137162972	0.800260972	0.831694753
257	NEH2_2014	Pollen_DAP	Pollen_DAP ~ Hybrid	~ Rep + Block:Rep	units	6.168329688	0.384069687	0.503747721
265	NEH2_2015	Pollen_DAP	Pollen_DAP ~ Hybrid	~ Rep + Block:Rep	units	5.437440883	0.417090027	0.436299056
275	NEH3_2015	Pollen_DAP	Pollen_DAP ~ Hybrid	~ Rep	units	2.036809893	0.433170596	0.451012314
279	NYH1_2014	Pollen_DAP	Pollen_DAP ~ Hybrid	~ Rep + Block:Rep + units	ar1v(Range):ar1(Pass)	1.519357779	0.842007066	0.910691964
285	NYH2_2015	Pollen_DAP	Pollen_DAP ~ Hybrid	~ Rep + Block:Rep	ar1(Range):idv(Pass)	1	0.923968281	0.901821527
298	NYH3_2015	Pollen_DAP	Pollen_DAP ~ Hybrid	~ Rep + Block:Rep	ar1v(Range):ar1(Pass)	1	0.934160918	0.893987925
306	OHH1_2015	Pollen_DAP	Pollen_DAP ~ Hybrid	~ Rep + Block:Rep	units	0.519481188	0.916885763	0.90919591
320	ONH1_2014	Pollen_DAP	Pollen_DAP ~ Hybrid	~ Rep + Block:Rep	units	1.183521641	0.94778098	0.953291363
328	ONH1_2015	Pollen_DAP	Pollen_DAP ~ Hybrid	~ Rep + Block:Rep	units	1.713246059	0.873612901	0.887106061
342	ONH2_2014	Pollen_DAP	Pollen_DAP ~ Hybrid	~ Rep + Block:Rep	units	0.634448831	0.907341342	0.947450941
350	ONH2_2015	Pollen_DAP	Pollen_DAP ~ Hybrid	~ Rep + Block:Rep	units	1.317284589	0.91086176	0.922652845
365	SDH1_2015	Pollen_DAP	Pollen_DAP ~ Hybrid	~ Rep + Block:Rep	units	3.081151501	0.783702181	0.815565574
372	TXH1_2014	Pollen_DAP	Pollen_DAP ~ Hybrid	~ Rep + Block:Rep + units	ar1v(Range):ar1(Pass)	1.188948127	0.669084072	0.874160579
379	TXH1_2015	Pollen_DAP	Pollen_DAP ~ Hybrid	~ Rep	units	0.70281138	0.926809314	0.945035037
386	TXH1_2016	Pollen_DAP	Pollen_DAP ~ Hybrid	~ Rep	units	1.004766493	0.798578027	0.882617493
394	TXH2_2014	Pollen_DAP	Pollen_DAP ~ Hybrid	~ Rep + Block:Rep	units	3.811809764	0.61430295	0.724177399
402	TXH2_2015	Pollen_DAP	Pollen_DAP ~ Hybrid	~ Rep + Block:Rep	units	1.611251297	0.810895994	0.854776508
410	WIH1_2014	Pollen_DAP	Pollen_DAP ~ Hybrid	~ Rep + Block:Rep	units	1.123663998	0.84161353	0.898013214
423	WIH1_2016	Pollen_DAP	Pollen_DAP ~ Hybrid	~ Rep	units	1.294917306	0.855883541	0.920281632
436	WIH2_2016	Pollen_DAP	Pollen_DAP ~ Hybrid	~ Rep	units	0.839873815	0.905705365	0.947365093
6	ARH1_2016	Silk_DAP	Silk_DAP ~ Hybrid	~ Rep	units	1.376323904	0.842124121	0.911724111
13	DEH1_2014	Silk_DAP	Silk_DAP ~ Hybrid	~ Rep + Block:Rep	units	1.439345977	0.663598679	0.756712765
21	DEH1_2015	Silk_DAP	Silk_DAP ~ Hybrid	~ Rep + Block:Rep	units	1.462913344	0.797014579	0.796415467
29	DEH1_2016	Silk_DAP	Silk_DAP ~ Hybrid	~ Rep	units	3.366472977	0.421309147	0.587114666
37	GAH1_2014	Silk_DAP	Silk_DAP ~ Hybrid	~ Rep + Block:Rep + units	ar1v(Range):ar1(Pass)	1.460457092	0.665411595	0.758182725
44	GAH1_2015	Silk_DAP	Silk_DAP ~ Hybrid	~ Rep	units	1.742947215	0.89597736	0.923861216
52	GAH1_2016	Silk_DAP	Silk_DAP ~ Hybrid	~ Rep	units	1.253044941	0.834588186	0.909765393
58	GAH2_2016	Silk_DAP	Silk_DAP ~ Hybrid	~ Rep	units	2.717692275	0.767223194	0.81921826
64	IAH1_2016	Silk_DAP	Silk_DAP ~ Hybrid	~ Rep + units	ar1v(Range):ar1(Pass)	2.110434624	0.801795695	0.880349086
72	IAH1ab_2014	Silk_DAP	Silk_DAP ~ Hybrid	~ Rep + Block:Rep	at(Experiment):idv(Range):ar1(Pass)	2	0.726695359	0.84051972
80	IAH1c_2014	Silk_DAP	Silk_DAP ~ Hybrid	~ Rep + Block:Rep	units	1.418534668	0.596664289	0.673534951
93	IAH2_2016	Silk_DAP	Silk_DAP ~ Hybrid	~ Rep	idv(Range):ar1(Pass)	1	0.897000468	0.920105418
105	IAH3_2016	Silk_DAP	Silk_DAP ~ Hybrid	~ Rep	units	4.868119821	0.480285926	0.637161216
123	ILH1_2014	Silk_DAP	Silk_DAP ~ Hybrid	~ Rep + Block:Rep	units	1.60165188	0.810898534	0.860678491
130	ILH1_2015	Silk_DAP	Silk_DAP ~ Hybrid	~ Rep + Block:Rep	units	3.234617787	0.762076696	0.770399029
137	ILH1_2016	Silk_DAP	Silk_DAP ~ Hybrid	~ Rep	units	3.106219055	0.202643017	0.278683291
145	INH1_2014	Silk_DAP	Silk_DAP ~ Hybrid	~ Rep + Block:Rep	units	11.91934637	0.187363897	0.302413901
152	INH1_2015	Silk_DAP	Silk_DAP ~ Hybrid	~ Rep + Block:Rep	ar1v(Range):ar1(Pass)	1	0.890434593	0.809906341
159	INH1_2016	Silk_DAP	Silk_DAP ~ Hybrid	~ Rep + units	ar1v(Range):ar1(Pass)	1.965844861	0.693433701	0.761808492
172	MIH1_2016	Silk_DAP	Silk_DAP ~ Hybrid	~ Rep	units	0.981259734	0.907999596	0.946904533
180	MNH1_2014	Silk_DAP	Silk_DAP ~ Hybrid	~ Rep + Block:Rep	idv(Range):ar1(Pass)	1	0.739683748	0.720443434
188	MNH1_2015	Silk_DAP	Silk_DAP ~ Hybrid	~ Rep + Block:Rep	units	7.220431144	0.587659087	0.609042301
197	MOH1_2014	Silk_DAP	Silk_DAP ~ Hybrid	~ Rep + Block:Rep	units	1.362327576	0.856636085	0.901243882
204	MOH1_2016	Silk_DAP	Silk_DAP ~ Hybrid	~ Rep	units	1.245547613	0.81480461	0.887509647
211	MOH1_MOH2_2015	Silk_DAP	Silk_DAP ~ Hybrid	~ Rep + Block:Rep + units	at(Experiment):ar1v(Range):ar1(Pass)	2.473551758	0.750618878	0.843362029
218	MOH2_2014	Silk_DAP	Silk_DAP ~ Hybrid	~ Rep + Block:Rep	units	0.672669835	0.802503659	0.861288759
240	NEH1_2014	Silk_DAP	Silk_DAP ~ Hybrid	~ Rep + Block:Rep	units	4.72267777	0.533361279	0.653042134
258	NEH2_2014	Silk_DAP	Silk_DAP ~ Hybrid	~ Rep + Block:Rep	units	11.2872585	0.298681804	0.41078163
266	NEH2_2015	Silk_DAP	Silk_DAP ~ Hybrid	~ Rep + Block:Rep	units	7.001179469	0.400890984	0.416767983
286	NYH2_2015	Silk_DAP	Silk_DAP ~ Hybrid	~ Rep + Block:Rep	ar1(Range):idv(Pass)	1	0.925455839	0.901635018
292	NYH2_2016	Silk_DAP	Silk_DAP ~ Hybrid	~ Rep	units	1.489592811	0.94854522	0.969268406
299	NYH3_2015	Silk_DAP	Silk_DAP ~ Hybrid	~ Rep + Block:Rep	ar1v(Range):ar1(Pass)	1	0.942880873	0.902549671
307	OHH1_2015	Silk_DAP	Silk_DAP ~ Hybrid	~ Rep + Block:Rep	units	0.80302766	0.895805345	0.88897495
321	ONH1_2014	Silk_DAP	Silk_DAP ~ Hybrid	~ Rep + Block:Rep	units	1.362118695	0.940903957	0.946018799
329	ONH1_2015	Silk_DAP	Silk_DAP ~ Hybrid	~ Rep + Block:Rep	units	1.893378625	0.864500285	0.879298952
335	ONH1_2016	Silk_DAP	Silk_DAP ~ Hybrid	~ Rep + units	idv(Range):ar1(Pass)	1.0000016	0.955340981	0.942756111
343	ONH2_2014	Silk_DAP	Silk_DAP ~ Hybrid	~ Rep + Block:Rep	units	0.735872583	0.923362411	0.941251554
351	ONH2_2015	Silk_DAP	Silk_DAP ~ Hybrid	~ Rep + Block:Rep	units	1.513747577	0.883707639	0.903343858
358	ONH2_2016	Silk_DAP	Silk_DAP ~ Hybrid	~ Rep	units	1.033743142	0.961584523	0.978572644
366	SDH1_2015	Silk_DAP	Silk_DAP ~ Hybrid	~ Rep + Block:Rep	units	4.701445134	0.783401356	0.816384634
373	TXH1_2014	Silk_DAP	Silk_DAP ~ Hybrid	~ Rep + Block:Rep + units	ar1v(Range):ar1(Pass)	1.310982503	0.63321439	0.851020731
380	TXH1_2015	Silk_DAP	Silk_DAP ~ Hybrid	~ Rep	units	1.01723165	0.907827163	0.930327745
387	TXH1_2016	Silk_DAP	Silk_DAP ~ Hybrid	~ Rep	units	1.073986594	0.772614751	0.865793385
395	TXH2_2014	Silk_DAP	Silk_DAP ~ Hybrid	~ Rep + Block:Rep	units	3.829424891	0.610775963	0.721655279
403	TXH2_2015	Silk_DAP	Silk_DAP ~ Hybrid	~ Rep + Block:Rep	units	2.383510565	0.739758059	0.795843138
411	WIH1_2014	Silk_DAP	Silk_DAP ~ Hybrid	~ Rep + Block:Rep	units	0.88243177	0.876561785	0.917917091
424	WIH1_2016	Silk_DAP	Silk_DAP ~ Hybrid	~ Rep	units	1.202435213	0.875224497	0.931626498
437	WIH2_2016	Silk_DAP	Silk_DAP ~ Hybrid	~ Rep	units	1.091084657	0.896557699	0.942024574
3	ARH1_2016	Twt_kg_m3	Twt_kg_m3 ~ Hybrid	~ Rep	units	216.7930716	0.564198111	0.723697978
18	DEH1_2015	Twt_kg_m3	Twt_kg_m3 ~ Hybrid	~ Rep	ar1v(Range):ar1(Pass)	1	0.995655165	0.531031288
26	DEH1_2016	Twt_kg_m3	Twt_kg_m3 ~ Hybrid	~ Rep	units	183.6616142	0.661783139	0.792642014
34	GAH1_2014	Twt_kg_m3	Twt_kg_m3 ~ Hybrid	~ Rep + Block:Rep	units	15553.23699	0.253364645	0.396074988
49	GAH1_2016	Twt_kg_m3	Twt_kg_m3 ~ Hybrid	~ Rep	units	2900.505055	0.071416443	0.135098239
61	IAH1_2016	Twt_kg_m3	Twt_kg_m3 ~ Hybrid	~ Rep	ar1v(Range):ar1(Pass)	1	0.997824627	0.915877601
69	IAH1ab_2014	Twt_kg_m3	Twt_kg_m3 ~ Hybrid	~ Rep + Block:Rep + units	at(Experiment):ar1v(Range):ar1(Pass)	24.18071141	0.92539148	0.847487077
77	IAH1c_2014	Twt_kg_m3	Twt_kg_m3 ~ Hybrid	~ Rep + Block:Rep	ar1(Range):idv(Pass)	1	0.994950871	0.791564776
85	IAH2_2014	Twt_kg_m3	Twt_kg_m3 ~ Hybrid	~ Rep + Block:Rep	units	95.99127868	0.776892682	0.855920544
91	IAH2_2016	Twt_kg_m3	Twt_kg_m3 ~ Hybrid	~ Rep	units	760.0508657	0.714347015	0.828642631
96	IAH3_2014	Twt_kg_m3	Twt_kg_m3 ~ Hybrid	~ Rep + Block:Rep	units	72.43391704	0.704036165	0.797603441
102	IAH3_2016	Twt_kg_m3	Twt_kg_m3 ~ Hybrid	~ Rep	units	257.7846961	0.409042074	0.57728433
110	IAH4_2014	Twt_kg_m3	Twt_kg_m3 ~ Hybrid	~ Rep + Block:Rep	units	53.63406909	0.816277337	0.879004036
116	IAH4_2016	Twt_kg_m3	Twt_kg_m3 ~ Hybrid	~ Rep	units	98.01946735	0.816810235	0.897822024
120	ILH1_2014	Twt_kg_m3	Twt_kg_m3 ~ Hybrid	~ Rep + Block:Rep	units	1991.82201	0.200605494	0.317475143
127	ILH1_2015	Twt_kg_m3	Twt_kg_m3 ~ Hybrid	~ Rep	units	372.2853745	0.36073659	0.384092091
142	INH1_2014	Twt_kg_m3	Twt_kg_m3 ~ Hybrid	~ Rep + Block:Rep	units	182.7997145	0.63860162	0.734142874
149	INH1_2015	Twt_kg_m3	Twt_kg_m3 ~ Hybrid	~ Rep	units	371.5367369	0.652810464	0.66966028
169	MIH1_2016	Twt_kg_m3	Twt_kg_m3 ~ Hybrid	~ Rep	units	2020.040896	0.212477961	0.329417845
177	MNH1_2014	Twt_kg_m3	Twt_kg_m3 ~ Hybrid	~ Rep + Block:Rep	units	321.6216697	0.15244619	0.228685148
185	MNH1_2015	Twt_kg_m3	Twt_kg_m3 ~ Hybrid	~ Rep	units	24.20559048	0.677224449	0.6969569
237	NEH1_2014	Twt_kg_m3	Twt_kg_m3 ~ Hybrid	~ Rep + Block:Rep	units	75.30050473	0.626522812	0.743189727
245	NEH1_2016	Twt_kg_m3	Twt_kg_m3 ~ Hybrid	~ Rep	units	14.98128694	0.483813019	0.651732417
249	NEH1_NEH4_2015	Twt_kg_m3	Twt_kg_m3 ~ Hybrid	~ Rep + Block:Rep	at(Experiment):ar1(Range):idv(Pass)	2	0.967803749	0.460956928
255	NEH2_2014	Twt_kg_m3	Twt_kg_m3 ~ Hybrid	~ Rep + Block:Rep	units	173.6556168	0.284619821	0.386874652
263	NEH2_2015	Twt_kg_m3	Twt_kg_m3 ~ Hybrid	~ Rep	units	66.68282553	0.666111105	0.68669203
269	NEH3_2014	Twt_kg_m3	Twt_kg_m3 ~ Hybrid	~ Rep + Block:Rep	units	119.8471946	0.295580104	0.365996723
274	NEH3_2015	Twt_kg_m3	Twt_kg_m3 ~ Hybrid	~ Rep	units	555.1039424	0.327305289	0.347098371
304	OHH1_2015	Twt_kg_m3	Twt_kg_m3 ~ Hybrid	~ Rep	units	97.57979668	0.845668179	0.855687607
312	OHH1_2016	Twt_kg_m3	Twt_kg_m3 ~ Hybrid	~ Rep	units	110.9982756	0.841466595	0.908150138
318	ONH1_2014	Twt_kg_m3	Twt_kg_m3 ~ Hybrid	~ Rep + Block:Rep	units	295.3775706	0.414685341	0.58141553
326	ONH1_2015	Twt_kg_m3	Twt_kg_m3 ~ Hybrid	~ Rep	units	145.0816905	0.632965912	0.667168062
333	ONH1_2016	Twt_kg_m3	Twt_kg_m3 ~ Hybrid	~ Rep	units	123.8174156	0.899886289	0.945018829
340	ONH2_2014	Twt_kg_m3	Twt_kg_m3 ~ Hybrid	~ Rep + Block:Rep	units	885.26373	0.287655484	0.416244514
348	ONH2_2015	Twt_kg_m3	Twt_kg_m3 ~ Hybrid	~ Rep	units	54.76259772	0.889436443	0.899411633
356	ONH2_2016	Twt_kg_m3	Twt_kg_m3 ~ Hybrid	~ Rep	units	1789.684102	0.135608342	0.235667869
363	SDH1_2015	Twt_kg_m3	Twt_kg_m3 ~ Hybrid	~ Rep	units	10199.48953	0.104112347	0.123288971
371	TXH1_2014	Twt_kg_m3	Twt_kg_m3 ~ Hybrid	~ Rep + Block:Rep	units	76.95771844	0.679790032	0.77773739
378	TXH1_2015	Twt_kg_m3	Twt_kg_m3 ~ Hybrid	~ Rep	units	87.72061997	0.82226384	0.862946339
385	TXH1_2016	Twt_kg_m3	Twt_kg_m3 ~ Hybrid	~ Rep	units	277.8820152	0.54671232	0.695319698
392	TXH2_2014	Twt_kg_m3	Twt_kg_m3 ~ Hybrid	~ Rep + Block:Rep	units	12207.05954	0.05967951	0.103630868
400	TXH2_2015	Twt_kg_m3	Twt_kg_m3 ~ Hybrid	~ Rep + Block:Rep	ar1(Range):idv(Pass)	1	0.990810329	0.654088182
408	WIH1_2014	Twt_kg_m3	Twt_kg_m3 ~ Hybrid	~ Rep + Block:Rep + units	ar1v(Range):ar1(Pass)	1.000028954	0.995894121	0.782668067
416	WIH1_2015	Twt_kg_m3	Twt_kg_m3 ~ Hybrid	~ Rep	ar1v(Range):ar1(Pass)	1	0.996751522	0.446816639
421	WIH1_2016	Twt_kg_m3	Twt_kg_m3 ~ Hybrid	~ Rep	units	855.4898397	0.43427923	0.601360861
434	WIH2_2016	Twt_kg_m3	Twt_kg_m3 ~ Hybrid	~ Rep	units	2317.517685	0.198394157	0.323835128
1	ARH1_2016	Yield_Mg_ha	Yield_Mg_ha ~ Hybrid + stand_lin_cov	~ Rep	units	1.007028782	0.280133364	0.433859934
9	DEH1_2014	Yield_Mg_ha	Yield_Mg_ha ~ Hybrid + stand_lin_cov	~ Rep + Block:Rep	units	1.497344182	0.400181153	0.541351816
16	DEH1_2015	Yield_Mg_ha	Yield_Mg_ha ~ Hybrid	~ Rep + Block:Rep	units	1.431098337	0.645603908	0.666092218
24	DEH1_2016	Yield_Mg_ha	Yield_Mg_ha ~ Hybrid	~ Rep	units	2.469199871	0.5630674	0.714841908
32	GAH1_2014	Yield_Mg_ha	Yield_Mg_ha ~ Hybrid + stand_lin_cov	~ Rep + Block:Rep + units	ar1v(Range):ar1(Pass)	1.732726168	0.517878899	0.669229819
40	GAH1_2015	Yield_Mg_ha	Yield_Mg_ha ~ Hybrid	~ Rep + units	ar1v(Range):ar1(Pass)	1.591537047	0.580055085	0.711042099
47	GAH1_2016	Yield_Mg_ha	Yield_Mg_ha ~ Hybrid + stand_lin_cov	~ Rep	units	2.367595386	0.44528674	0.615196441
55	GAH2_2016	Yield_Mg_ha	Yield_Mg_ha ~ Hybrid + stand_lin_cov	~ Rep	units	3.122239346	0.309899513	0.391773968
59	IAH1_2016	Yield_Mg_ha	Yield_Mg_ha ~ Hybrid + stand_quad_cov	~ Rep + units	ar1v(Range):ar1(Pass)	1.543614743	0.496185622	0.741127817
67	IAH1ab_2014	Yield_Mg_ha	Yield_Mg_ha ~ Hybrid + stand_lin_cov	~ Rep + Block:Rep + units	at(Experiment):ar1v(Range):ar1(Pass)	2.582931295	0.236143618	0.553861391
75	IAH1c_2014	Yield_Mg_ha	Yield_Mg_ha ~ Hybrid + stand_lin_cov	~ Rep + Block:Rep	units	1.104744578	0.316191099	0.421094879
83	IAH2_2014	Yield_Mg_ha	Yield_Mg_ha ~ Hybrid + stand_lin_cov	~ Rep + Block:Rep	units	1.145898584	0.522014338	0.669521257
89	IAH2_2016	Yield_Mg_ha	Yield_Mg_ha ~ Hybrid + stand_lin_cov	~ Rep	ar1v(Range):ar1(Pass)	1	0.879363379	0.857520083
94	IAH3_2014	Yield_Mg_ha	Yield_Mg_ha ~ Hybrid + stand_quad_cov	~ Rep + Block:Rep	units	1.071505091	0.646937771	0.764236522
100	IAH3_2016	Yield_Mg_ha	Yield_Mg_ha ~ Hybrid	~ Rep	units	3.646005976	0.142530134	0.246661525
108	IAH4_2014	Yield_Mg_ha	Yield_Mg_ha ~ Hybrid	~ Rep + Block:Rep	units	0.878158805	0.5858806	0.711100454
114	IAH4_2016	Yield_Mg_ha	Yield_Mg_ha ~ Hybrid + stand_lin_cov	~ Rep	units	2.128962773	0.488025058	0.653246773
118	ILH1_2014	Yield_Mg_ha	Yield_Mg_ha ~ Hybrid + stand_lin_cov	~ Rep + Block:Rep + units	ar1(Range):idv(Pass)	1.73345328	0.498001734	0.685729734
126	ILH1_2015	Yield_Mg_ha	Yield_Mg_ha ~ Hybrid	~ Rep + Block:Rep	units	1.121324244	0.618867528	0.620979396
133	ILH1_2016	Yield_Mg_ha	Yield_Mg_ha ~ Hybrid	~ Rep	units	4.636056134	0.097224935	0.143139406
140	INH1_2014	Yield_Mg_ha	Yield_Mg_ha ~ Hybrid + stand_lin_cov	~ Rep + Block:Rep	units	0.734517761	0.465198262	0.598555529
147	INH1_2015	Yield_Mg_ha	Yield_Mg_ha ~ Hybrid	~ Rep + Block:Rep	units	1.66546939	0.442377367	0.455304938
155	INH1_2016	Yield_Mg_ha	Yield_Mg_ha ~ Hybrid	~ Rep + units	ar1v(Range):ar1(Pass)	1.871991459	0.618429272	0.738975368
162	KSH2_2016	Yield_Mg_ha	Yield_Mg_ha ~ Hybrid	~ Rep	units	0.801652915	0.572806566	0.612283937
167	MIH1_2016	Yield_Mg_ha	Yield_Mg_ha ~ Hybrid + stand_lin_cov + stand_quad_cov	~ Rep	units	2.445920652	0.612232378	0.741768583
175	MNH1_2014	Yield_Mg_ha	Yield_Mg_ha ~ Hybrid + stand_lin_cov	~ Rep + Block:Rep	units	1.077332831	0.272366124	0.379434102
183	MNH1_2015	Yield_Mg_ha	Yield_Mg_ha ~ Hybrid	~ Rep + Block:Rep	units	0.758424692	0.586187103	0.609905099
191	MNH1_2016	Yield_Mg_ha	Yield_Mg_ha ~ Hybrid	~ Rep	units	1.141639919	0.514205289	0.665216148
193	MOH1_2014	Yield_Mg_ha	Yield_Mg_ha ~ Hybrid + stand_lin_cov	~ Rep + Block:Rep + units	ar1(Range):idv(Pass)	1.587230378	0.303641257	0.484190734
200	MOH1_2016	Yield_Mg_ha	Yield_Mg_ha ~ Hybrid + stand_lin_cov	~ Rep	units	1.523755266	0.434278804	0.584032361
207	MOH1_MOH2_2015	Yield_Mg_ha	Yield_Mg_ha ~ Hybrid + stand_lin_cov	~ Rep + Block:Rep	units	2.000816657	0.273198825	0.335272218
214	MOH2_2014	Yield_Mg_ha	Yield_Mg_ha ~ Hybrid + stand_lin_cov	~ Rep + Block:Rep	units	1.896407635	0.454884568	0.605945879
221	NCH1_2014	Yield_Mg_ha	Yield_Mg_ha ~ Hybrid + stand_lin_cov	~ Rep + Block:Rep	ar1v(Range):ar1(Pass)	1	0.445955468	0.711268568
226	NCH1_2015	Yield_Mg_ha	Yield_Mg_ha ~ Hybrid + stand_lin_cov	~ Rep + Block:Rep	units	1.159080497	0.668529066	0.670972785
230	NCH1_2016	Yield_Mg_ha	Yield_Mg_ha ~ Hybrid + stand_lin_cov + stand_quad_cov	~ Rep	units	1.386600538	0.528311436	0.66655003
235	NEH1_2014	Yield_Mg_ha	Yield_Mg_ha ~ Hybrid + stand_lin_cov	~ Rep + Block:Rep + units	ar1v(Range):ar1(Pass)	2.050489727	0.285721678	0.3737268
243	NEH1_2016	Yield_Mg_ha	Yield_Mg_ha ~ Hybrid	~ Rep	units	1.803389464	0.528140667	0.689093449
247	NEH1_NEH4_2015	Yield_Mg_ha	Yield_Mg_ha ~ Hybrid	~ Rep + Block:Rep	units	2.923456691	0.245720691	0.31764808
253	NEH2_2014	Yield_Mg_ha	Yield_Mg_ha ~ Hybrid	~ Rep + Block:Rep	ar1v(Range):ar1(Pass)	1	0.247679532	0.221536769
261	NEH2_2015	Yield_Mg_ha	Yield_Mg_ha ~ Hybrid	~ Rep + Block:Rep	units	1.130467723	0.164638782	0.177410321
267	NEH3_2014	Yield_Mg_ha	Yield_Mg_ha ~ Hybrid	~ Rep + Block:Rep + units	ar1v(Range):ar1(Pass)	1.389269438	0.200566144	0.284971468
272	NEH3_2015	Yield_Mg_ha	Yield_Mg_ha ~ Hybrid + stand_lin_cov	~ Rep + Block:Rep	units	1.006614428	0.374032989	0.390934108
276	NYH1_2014	Yield_Mg_ha	Yield_Mg_ha ~ Hybrid + stand_lin_cov	~ Rep + Block:Rep	ar1v(Range):ar1(Pass)	1	0.528445225	0.687549293
282	NYH2_2015	Yield_Mg_ha	Yield_Mg_ha ~ Hybrid	~ Rep + Block:Rep	units	2.630907782	0.399112471	0.452856618
289	NYH2_2016	Yield_Mg_ha	Yield_Mg_ha ~ Hybrid	~ Rep	units	5.531679381	0.248277487	0.375556913
295	NYH3_2015	Yield_Mg_ha	Yield_Mg_ha ~ Hybrid	~ Rep + Block:Rep	units	2.425616191	0.459628719	0.510421604
302	OHH1_2015	Yield_Mg_ha	Yield_Mg_ha ~ Hybrid + stand_lin_cov	~ Rep + Block:Rep	units	0.528525163	0.766176945	0.771003598
310	OHH1_2016	Yield_Mg_ha	Yield_Mg_ha ~ Hybrid	~ Rep	units	0.978571966	0.755927486	0.854524751
316	ONH1_2014	Yield_Mg_ha	Yield_Mg_ha ~ Hybrid + stand_lin_cov	~ Rep + Block:Rep	units	0.852081133	0.467102293	0.607095479
324	ONH1_2015	Yield_Mg_ha	Yield_Mg_ha ~ Hybrid	~ Rep + Block:Rep	units	0.91955829	0.712456161	0.756050461
331	ONH1_2016	Yield_Mg_ha	Yield_Mg_ha ~ Hybrid	~ Rep + units	ar1v(Range):ar1(Pass)	1.00000052	0.685176297	0.733932246
338	ONH2_2014	Yield_Mg_ha	Yield_Mg_ha ~ Hybrid + stand_lin_cov	~ Rep + Block:Rep	units	0.928832445	0.390823064	0.533911961
346	ONH2_2015	Yield_Mg_ha	Yield_Mg_ha ~ Hybrid + stand_lin_cov	~ Rep + Block:Rep	units	1.041189189	0.587327745	0.640623631
354	ONH2_2016	Yield_Mg_ha	Yield_Mg_ha ~ Hybrid	~ Rep	units	2.826962311	0.417968254	0.574591987
361	SDH1_2015	Yield_Mg_ha	Yield_Mg_ha ~ Hybrid + stand_lin_cov	~ Rep + Block:Rep	units	1.463718189	0.440373549	0.494963665
369	TXH1_2014	Yield_Mg_ha	Yield_Mg_ha ~ Hybrid + stand_lin_cov	~ Rep + Block:Rep	units	0.975992898	0.49998168	0.646570439
376	TXH1_2015	Yield_Mg_ha	Yield_Mg_ha ~ Hybrid + stand_lin_cov + stand_quad_cov	~ Rep	units	0.666477909	0.706592447	0.767369791
383	TXH1_2016	Yield_Mg_ha	Yield_Mg_ha ~ Hybrid + stand_lin_cov + stand_quad_cov	~ Rep	units	0.913313681	0.507587575	0.661138663
390	TXH2_2014	Yield_Mg_ha	Yield_Mg_ha ~ Hybrid + stand_lin_cov	~ Rep + Block:Rep	units	2.73564809	0.32377037	0.460069858
398	TXH2_2015	Yield_Mg_ha	Yield_Mg_ha ~ Hybrid	~ Rep + Block:Rep	units	2.215645915	0.354207956	0.441603166
406	WIH1_2014	Yield_Mg_ha	Yield_Mg_ha ~ Hybrid + stand_lin_cov + stand_quad_cov	~ Rep + Block:Rep	units	1.295517971	0.64938635	0.786159079
414	WIH1_2015	Yield_Mg_ha	Yield_Mg_ha ~ Hybrid	~ Rep + Block:Rep	units	0.943164667	0.763614358	0.778437194
419	WIH1_2016	Yield_Mg_ha	Yield_Mg_ha ~ Hybrid	~ Rep	units	1.901245172	0.620391487	0.762200852
427	WIH2_2015	Yield_Mg_ha	Yield_Mg_ha ~ Hybrid	~ Rep + Block:Rep	ar1v(Range):ar1(Pass)	1	0.504082761	0.303387779
432	WIH2_2016	Yield_Mg_ha	Yield_Mg_ha ~ Hybrid	~ Rep	units	3.617278943	0.603569715	0.743841076
